# Supplementary material for: China Wildfire Emission (ChinaWED v1) for the period 2012–2022
Source: Copernicus journal article supplement (doi:10.5194/gmd-2024-170), 2024-09-27
Supplement: Supplementary file 1 [file gmd-2024-170-supplement.pdf]

## Supplementary materials

**Table S1 The settings of combustion completeness in different land cover types.**

| $\text{frac}_{\text{forest}}$ | >60% | 40%-60%                      | <40% |
|-------------------------------|------|------------------------------|------|
| cropland                      | 0.93 | 0                            | 0    |
| grassland                     | 0.9  | $e^{-0.13 \times \text{FB}}$ | 0.98 |
| forest                        | 0.3  | 0.05                         | 0    |

Note:  $\text{frac}_{\text{forest}}$  indicates the fraction of percentage of forest cover. FB stands for the fraction of burned within an individual grid cell.

**Table S2 The emission factors of wildfire-induced emissions for various GHG types (unit: g kg<sup>-1</sup> dry matter).**

| <b>GHG</b>       | <b>Grassland</b> | <b>Trop. F</b> | <b>Temp. F</b> | <b>Bor. F</b> | <b>Cropland</b> | <b>Wheat</b> | <b>Rice</b> | <b>Maize</b> | <b>Sugarcane</b> |
|------------------|------------------|----------------|----------------|---------------|-----------------|--------------|-------------|--------------|------------------|
| CO <sub>2</sub>  | 1666.3±81.2      | 1632.1±65.0    | 1583.7±123.3   | 1519.2±136.5  | 1452.8±222.7    | 1454.4±50.0  | 1474.0±221  | 1336.0±36.6  | 1270.0±170.0     |
| CH <sub>4</sub>  | 2.63±2.12        | 6.10±1.82      | 5.05±2.79      | 5.59±2.65     | 5.72±5.60       | 2.46±1.19    | 3.51±3.12   | 3.72±1.72    | 0.40±0.20        |
| N <sub>2</sub> O | 0.17±0.09        | 0.20±0.1       | 0.19±0.18      | 0.27±0.12     | 0.09±0.04       | 0.07±0.02    | 0.07±0.02   | 0.14±0.03    | 0.09±0.04        |

Note: Grassland represents all short vegetation dominated areas including grassland, shrubland and other herbaceous areas. Trop. F, Temp. F and Bor. F are the abbreviations for tropical, temperate and boreal forest. The different types of crop residues including wheat, rice, maize and sugarcane were contained within the extent of cropland pixels, using the ratio between planting area and grid area for calculation. The references are listed at the end of the text [1–14].

**Table S3 Average burned area and wildfire-induced GHG emissions at regional and provincial level from 2012 to 2022.**

| <b>Region/Province</b> | <b>Burned area (Mha yr<sup>-1</sup>)</b> | <b>CO<sub>2</sub> (Tg yr<sup>-1</sup>)</b> | <b>CH<sub>4</sub> (Gg yr<sup>-1</sup>)</b> | <b>N<sub>2</sub>O (Gg yr<sup>-1</sup>)</b> | <b>Major fuel type<sup>†</sup></b> | <b>Peak month<sup>#</sup></b> |
|------------------------|------------------------------------------|--------------------------------------------|--------------------------------------------|--------------------------------------------|------------------------------------|-------------------------------|
| <i>Northeast China</i> | 3.29 ± 1.49                              | 43.07 ± 19.22                              | 159.34 ± 73.01                             | 3.33 ± 1.31                                | Crop                               | April                         |
| Nei Mongol             | 0.48 ± 0.16                              | 4.98 ± 2.16                                | 16.48 ± 7.53                               | 0.54 ± 0.30                                | Crop                               | March                         |
| Liaoning               | 0.09 ± 0.04                              | 1.28 ± 0.57                                | 4.85 ± 2.22                                | 0.10 ± 0.04                                | Crop                               | April                         |
| Jilin                  | 0.65 ± 0.50                              | 9.10 ± 6.80                                | 34.28 ± 25.09                              | 0.58 ± 0.41                                | Crop                               | April                         |
| Heilongjiang           | 2.06 ± 1.18                              | 27.71 ± 15.22                              | 103.73 ± 57.72                             | 2.12 ± 1.03                                | Crop                               | April                         |
| <i>East China</i>      | 0.73 ± 0.95                              | 10.51 ± 10.75                              | 38.20 ± 38.60                              | 0.73 ± 0.69                                | Crop                               | June                          |
| Shanghai               | 0.00 ± 0.00                              | 0.01 ± 0.01                                | 0.03 ± 0.03                                | 0.00 ± 0.00                                | Crop                               | November                      |
| Jiangsu                | 0.13 ± 0.21                              | 1.43 ± 2.12                                | 5.22 ± 7.64                                | 0.09 ± 0.13                                | Crop                               | June                          |
| Zhejiang               | 0.01 ± 0.01                              | 0.40 ± 0.21                                | 1.44 ± 0.73                                | 0.03 ± 0.02                                | Crop                               | March                         |
| Anhui                  | 0.41 ± 0.67                              | 4.26 ± 6.75                                | 15.29 ± 24.10                              | 0.26 ± 0.41                                | Crop                               | June                          |
| Jiangxi                | 0.04 ± 0.03                              | 1.32 ± 0.98                                | 4.76 ± 3.52                                | 0.11 ± 0.08                                | Crop                               | January                       |
| Hubei                  | 0.08 ± 0.05                              | 1.27 ± 0.96                                | 4.72 ± 3.53                                | 0.09 ± 0.07                                | Crop                               | February                      |
| Hunan                  | 0.06 ± 0.03                              | 1.82 ± 1.20                                | 6.74 ± 4.35                                | 0.14 ± 0.10                                | Crop                               | January                       |
| <i>North China</i>     | 0.74 ± 0.58                              | 6.14 ± 4.64                                | 21.57 ± 16.34                              | 0.41 ± 0.29                                | Crop                               | June                          |
| Beijing                | 0.00 ± 0.00                              | 0.03 ± 0.03                                | 0.13 ± 0.11                                | 0.00 ± 0.00                                | Crop                               | October                       |
| Tianjin                | 0.01 ± 0.01                              | 0.11 ± 0.06                                | 0.41 ± 0.22                                | 0.01 ± 0.00                                | Crop                               | January                       |
| Hebei                  | 0.11 ± 0.07                              | 0.83 ± 0.46                                | 2.83 ± 1.58                                | 0.06 ± 0.03                                | Crop                               | June                          |
| Shanxi                 | 0.08 ± 0.03                              | 0.70 ± 0.33                                | 2.29 ± 1.05                                | 0.06 ± 0.03                                | Crop                               | March                         |
| Shandong               | 0.17 ± 0.03                              | 1.54 ± 1.14                                | 5.57 ± 4.08                                | 0.10 ± 0.07                                | Crop                               | June                          |
| Henan                  | 0.37 ± 0.43                              | 2.93 ± 3.26                                | 10.35 ± 11.39                              | 0.18 ± 0.20                                | Crop                               | May                           |

| Region/Province        | Burned area (Mha yr <sup>-1</sup> ) | CO <sub>2</sub> (Tg yr <sup>-1</sup> ) | CH <sub>4</sub> (Gg yr <sup>-1</sup> ) | N <sub>2</sub> O (Gg yr <sup>-1</sup> ) | Major fuel type <sup>†</sup> | Peak month <sup>#</sup> |
|------------------------|-------------------------------------|----------------------------------------|----------------------------------------|-----------------------------------------|------------------------------|-------------------------|
| <i>South China</i>     | 0.16 ± 0.05                         | 5.93 ± 1.97                            | 20.49 ± 6.83                           | 0.53 ± 0.17                             | Crop                         | January                 |
| Fujian                 | 0.02 ± 0.01                         | 0.66 ± 0.21                            | 2.24 ± 0.74                            | 0.06 ± 0.02                             | Forest                       | January                 |
| Guangdong              | 0.05 ± 0.03                         | 1.92 ± 1.19                            | 6.72 ± 4.15                            | 0.16 ± 0.10                             | Crop                         | January                 |
| Guangxi                | 0.08 ± 0.01                         | 3.02 ± 0.63                            | 10.32 ± 2.17                           | 0.27 ± 0.06                             | Crop                         | January                 |
| Hainan                 | 0.01 ± 0.01                         | 0.25 ± 0.14                            | 0.91 ± 0.51                            | 0.02 ± 0.01                             | Crop                         | February                |
| Taiwan                 | 0.00 ± 0.00                         | 0.07 ± 0.02                            | 0.27 ± 0.09                            | 0.00 ± 0.00                             | Crop                         | March                   |
| Hong Kong              | 0.00 ± 0.00                         | 0.01 ± 0.01                            | 0.03 ± 0.04                            | 0.00 ± 0.00                             | Forest                       | March                   |
| Macau                  | 0.00 ± 0.00                         | 0.00 ± 0.00                            | 0.00 ± 0.00                            | 0.00 ± 0.00                             | Grass                        | January                 |
| <i>Northwest China</i> | 0.12 ± 0.06                         | 1.36 ± 0.77                            | 4.84 ± 2.76                            | 0.10 ± 0.06                             | Crop                         | April                   |
| Shaanxi                | 0.03 ± 0.02                         | 0.29 ± 0.18                            | 1.02 ± 0.64                            | 0.03 ± 0.02                             | Crop                         | March                   |
| Gansu                  | 0.02 ± 0.01                         | 0.14 ± 0.04                            | 0.48 ± 0.13                            | 0.01 ± 0.00                             | Crop                         | March                   |
| Qinghai                | 0.00 ± 0.00                         | 0.03 ± 0.01                            | 0.08 ± 0.03                            | 0.00 ± 0.00                             | Crop                         | October                 |
| Ningxia                | 0.01 ± 0.01                         | 0.09 ± 0.06                            | 0.29 ± 0.20                            | 0.01 ± 0.00                             | Crop                         | October                 |
| Xinjiang               | 0.06 ± 0.04                         | 0.82 ± 0.58                            | 2.97 ± 2.05                            | 0.06 ± 0.04                             | Crop                         | April                   |
| <i>Southwest China</i> | 0.26 ± 0.09                         | 11.11 ± 4.45                           | 35.02 ± 13.47                          | 1.17 ± 0.50                             | Forest                       | February                |
| Chongqing              | 0.00 ± 0.00                         | 0.19 ± 0.10                            | 0.72 ± 0.36                            | 0.01 ± 0.01                             | Crop                         | August                  |
| Sichuan                | 0.05 ± 0.03                         | 2.11 ± 1.23                            | 6.80 ± 3.88                            | 0.23 ± 0.16                             | Forest                       | January                 |
| Guizhou                | 0.04 ± 0.02                         | 1.18 ± 0.58                            | 4.17 ± 2.10                            | 0.10 ± 0.05                             | Crop                         | March                   |
| Yunnan                 | 0.16 ± 0.07                         | 7.57 ± 3.71                            | 23.13 ± 11.08                          | 0.81 ± 0.41                             | Forest                       | February                |
| Xizang                 | 0.00 ± 0.00                         | 0.06 ± 0.05                            | 0.19 ± 0.15                            | 0.01 ± 0.01                             | Forest                       | March                   |

† The land cover types (Cropland, Grassland, Forests) with the most wildfire-induced CO<sub>2</sub> emission.

# The single month with the most wildfire-induced CO<sub>2</sub> emission.

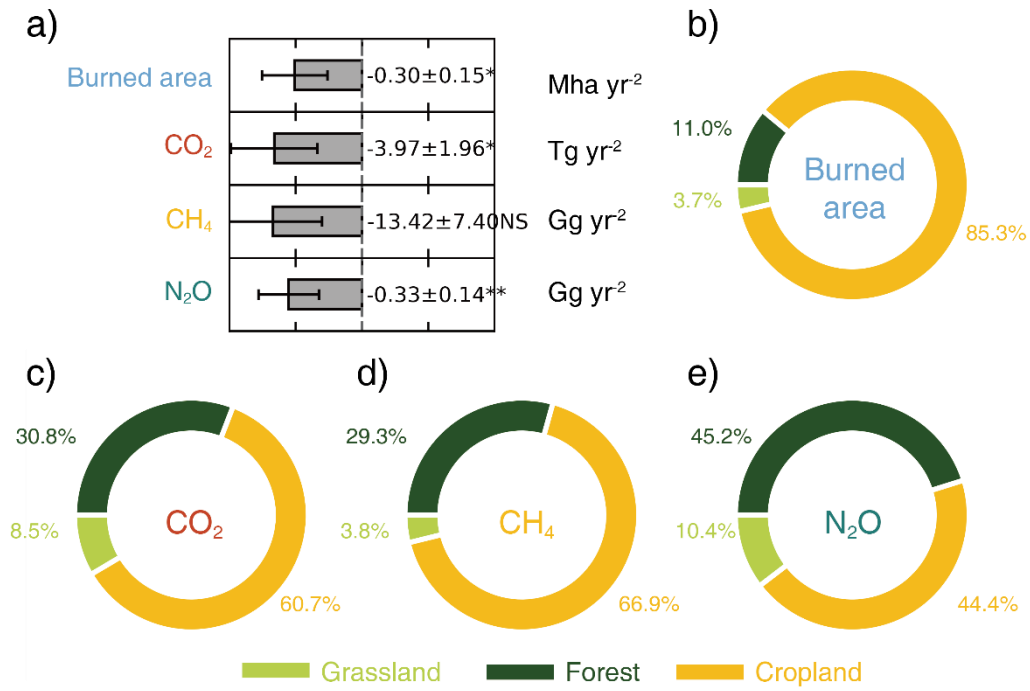

Fig. S1 The national trends of burned area and three wildfire-induced GHGs. Subplots b) to e) demonstrates the relative proportions of different types of fuels contributing the overall trends.

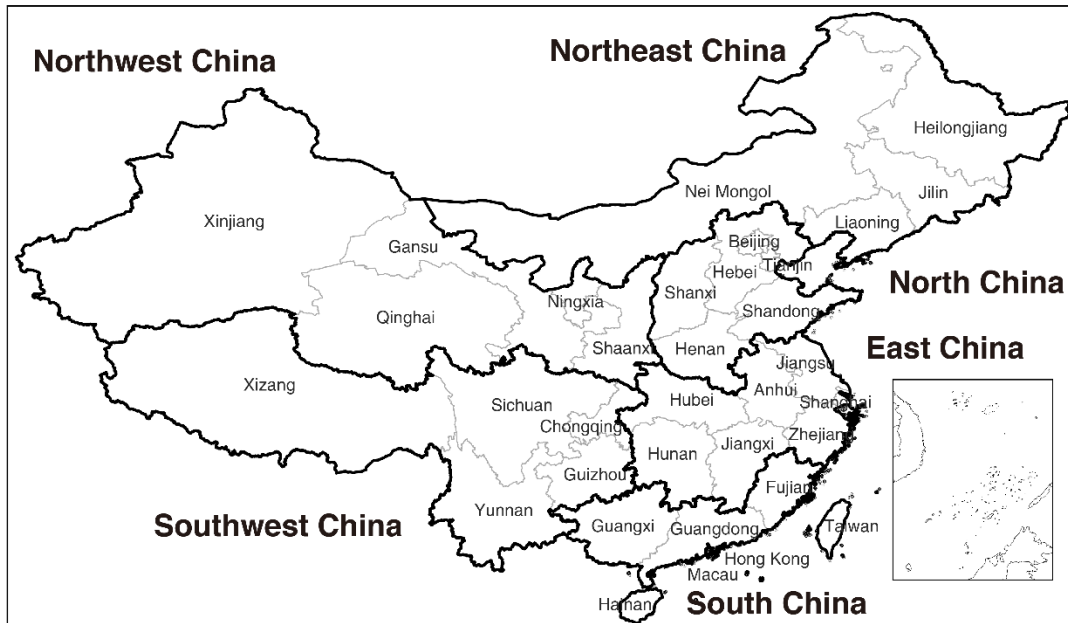

Fig. S2 The classification of six major regions discussed. All of the provincial administrative units are marked in lower font within the regional scope.

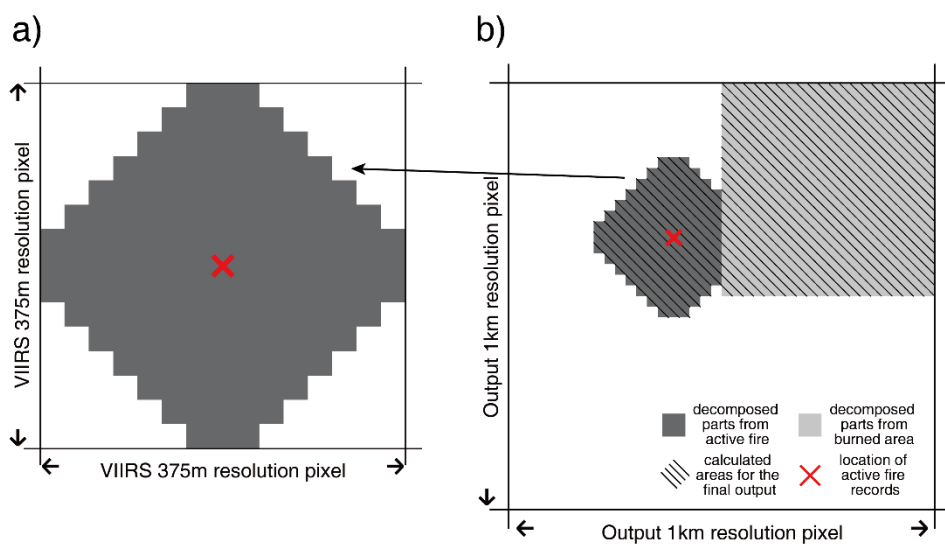

Fig. S3 Samples of processing active fire and burned area products. The subplot a) and b) represent the scope of 375m resolution VIIRS pixel and 1km resolution output pixel with small pixels decomposed. The details are listed as the legend shows.

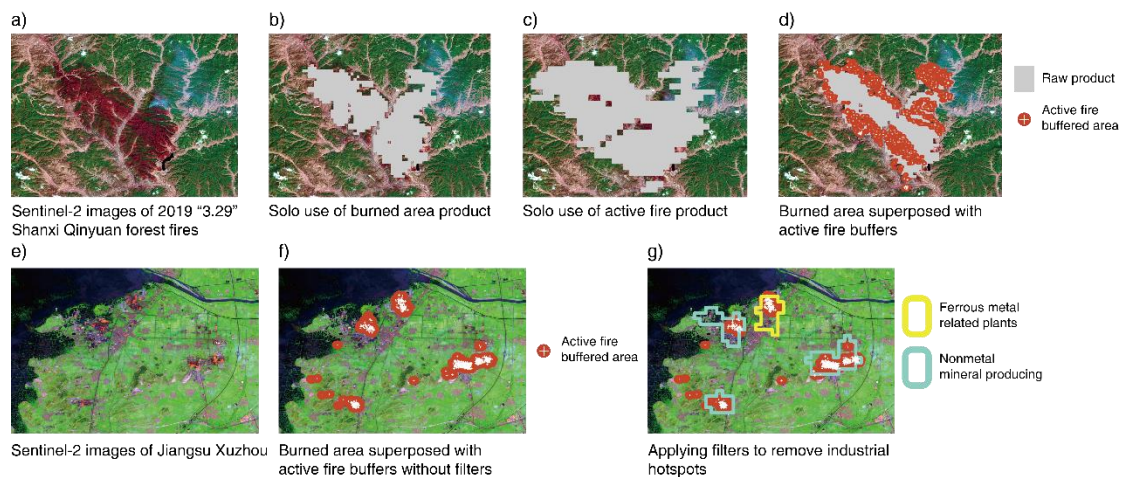

Fig. S4 Two samples of the recalculated burned area estimate with the first row demonstrating the burned area superposed by active fire buffering areas and the second row showing the filters of fixed location industrial hotspots [15]. The background images are composite of Sentinel-2 images.



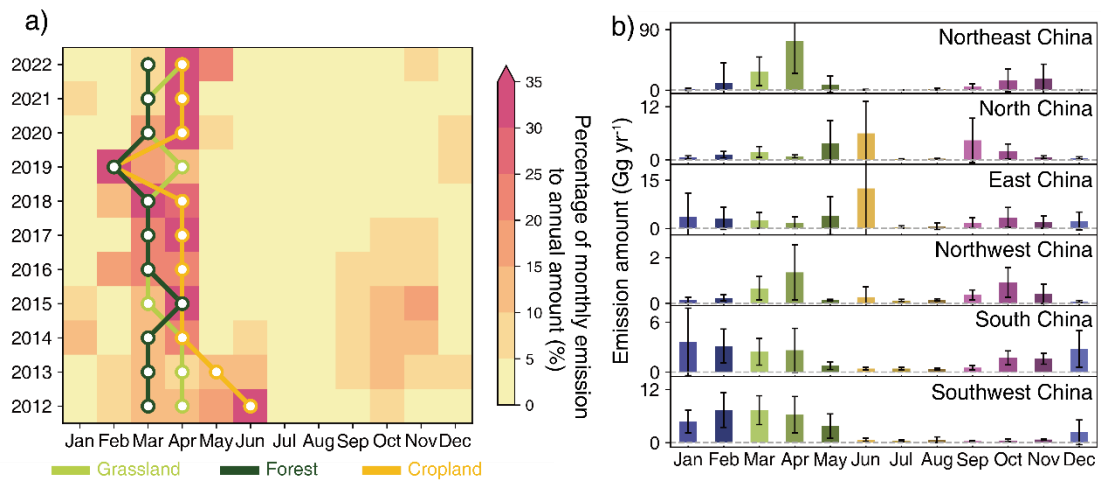

Fig. S5 Seasonal cycle of national and regional wildfire-induced CH<sub>4</sub> emissions with the same meaning of vertical lines and bars with that in Fig. 2. Emissions from six regions are depicted on distinct Y-axes to accurately capture the seasonal variations in emissions patterns. Four sets of colors indicate four seasons.

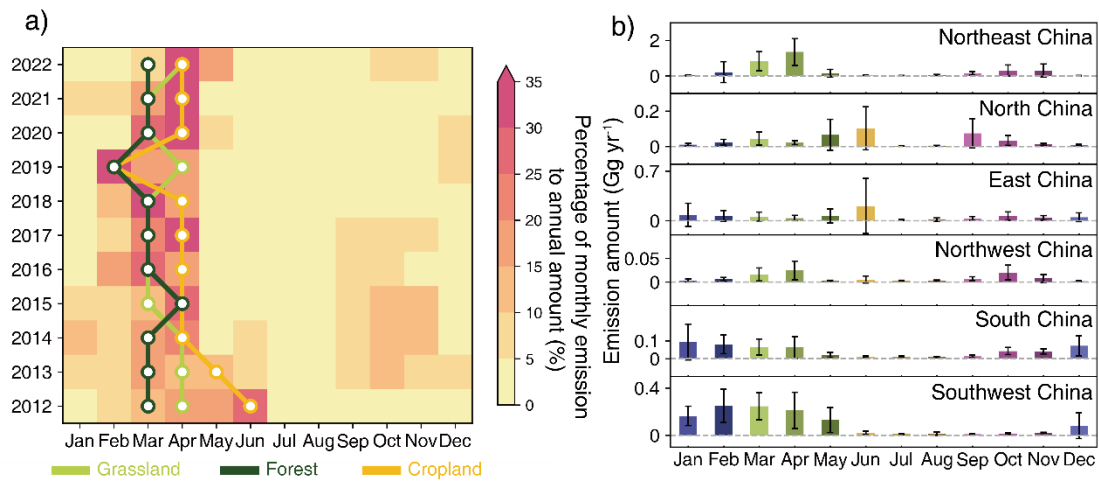

Fig. S6 Seasonal cycle of national and regional wildfire-induced N<sub>2</sub>O emissions with the same meaning of vertical lines and bars with that in Fig. 2. Emissions from six regions are depicted on distinct Y-axes to accurately capture the seasonal variations in emissions patterns. Four sets of colors indicate four seasons.

## References

1. Andreae MO. Emission of trace gases and aerosols from biomass burning – an updated assessment. *Atmospheric Chemistry and Physics* 2019;**19**:8523–46.
2. Akagi SK, Yokelson RJ, Wiedinmyer C *et al.* Emission factors for open and domestic biomass burning for use in atmospheric models. *Atmos Chem Phys* 2011;**11**:4039–72.
3. Akagi SK, Burling IR, Mendoza A *et al.* Field measurements of trace gases emitted by prescribed fires in southeastern US pine forests using an open-path FTIR system. *Atmos Chem Phys* 2014;**14**:199–215.
4. Wilson D, Dixon SD, Artz RRE *et al.* Derivation of greenhouse gas emission factors for peatlands managed for extraction in the Republic of Ireland and the United Kingdom. *Biogeosciences* 2015;**12**:5291–308.
5. Stockwell CE, Christian TJ, Goetz JD *et al.* Nepal Ambient Monitoring and Source Testing Experiment (NAMaSTE): emissions of trace gases and light-absorbing carbon from wood and dung cooking fires, garbage and crop residue burning, brick kilns, and other sources. *Atmos Chem Phys* 2016;**16**:11043–81.
6. Hamada Y, Darung U, Limin SH *et al.* Characteristics of fire-generated gas emission observed during a large peatland fire in 2009 at Kalimantan, Indonesia. *Atmospheric Environment* 2013;**74**:177–81.
7. Li X, Wang S, Duan L *et al.* Particulate and Trace Gas Emissions from Open Burning of Wheat Straw and Corn Stover in China. *Environ Sci Technol* 2007;**41**:6052–8.
8. Zhang Y, Shao M, Lin Y *et al.* Emission inventory of carbonaceous pollutants from biomass burning in the Pearl River Delta Region, China. *Atmospheric Environment* 2013;**76**:189–99.
9. Li J, Bo Y, Xie S. Estimating emissions from crop residue open burning in China based on statistics and MODIS fire products. *Journal of Environmental Sciences* 2016;**44**:158–70.
10. Li J, Li Y, Bo Y *et al.* High-resolution historical emission inventories of crop residue burning in fields in China for the period 1990–2013. *Atmospheric Environment* 2016;**138**:152–61.
11. Das B, Bhave PV, Puppala SP *et al.* A model-ready emission inventory for crop residue open burning in the context of Nepal. *Environmental Pollution* 2020;**266**:115069.
12. Streets DG, Gupta S, Waldhoff ST *et al.* Black carbon emissions in China. *Atmospheric Environment* 2001;**35**:4281–96.

13. Dennis A, Fraser M, Anderson S *et al.* Air pollutant emissions associated with forest, grassland, and agricultural burning in Texas. *Atmospheric Environment* 2002;**36**:3779–92.

14. Yokelson RJ, Burling IR, Gilman JB *et al.* Coupling field and laboratory measurements to estimate the emission factors of identified and unidentified trace gases for prescribed fires. *Atmospheric Chemistry and Physics* 2013;**13**:89–116.

15. Liu Y, Hu C, Zhan W *et al.* Identifying industrial heat sources using time-series of the VIIRS Nightfire product with an object-oriented approach. *Remote Sensing of Environment* 2018;**204**:347–65.
